# Supplementary material for: Impact of precursor size on the chain structure and mechanical properties of solvent-swollen epoxy gels
Source: Royal Society of Chemistry journal article supplement (doi:10.1039/c2sm25768h), 2012-01-01
Supplement: c2sm25768h.pdf [file c2sm25768h.pdf]

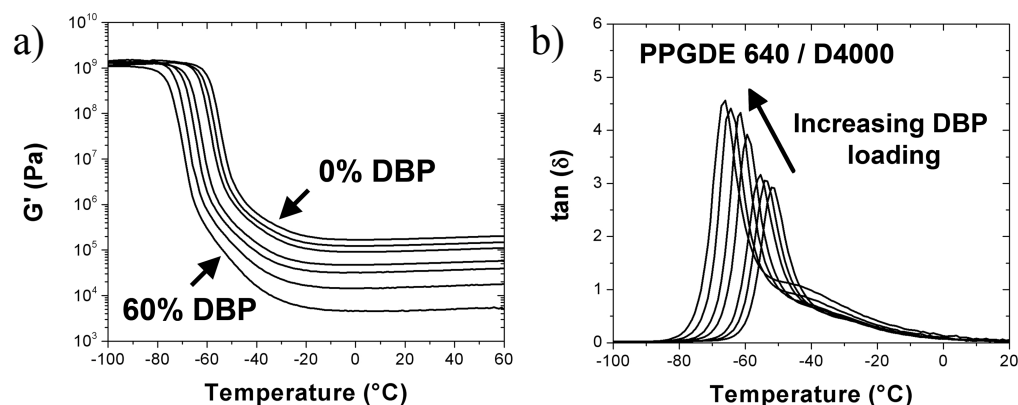

**Figure S1:** a) Storage modulus and b) loss tangent as a function of temperature for PPGDE 640/D4000 with DBP solvent loadings from 0 – 60 mass %.

## Near Infrared (NIR) Analysis of Epoxy Amine Reaction

Near Infrared spectroscopy was used to monitor the epoxy-amine reaction progress. Specifically, we monitored the disappearance of the following previously assigned peaks:

4530  $\text{cm}^{-1}$  ~ epoxy stretching and bending<sup>1</sup>

4925  $\text{cm}^{-1}$  ~ primary amine<sup>2</sup>

6080  $\text{cm}^{-1}$  ~ epoxy stretching<sup>1</sup>

6570 and 6670  $\text{cm}^{-1}$  ~ combination of primary and secondary amine vibrations<sup>1</sup>

## NIR of D230 w/ 0 % DBP

Figure S2 shows the changes in the FTIR spectrum of a D230 / PPGDE640 sample containing 0% DBP with increasing cure time. All peaks including 4530, 4925, 6080, 6570, and 6670  $\text{cm}^{-1}$  exhibited near complete disappearance after 15 h of cure at 90 °C. There were additional negligible changes between 15 h and 3 days and between 3 days and 6 days, respectively. The elimination of the assigned peaks indicates complete extent of cure for the highest cross-link density (D230 / PPGDE640) elastomer with 0 % DBP within 6 days of cure and the resolution of IR spectroscopy.

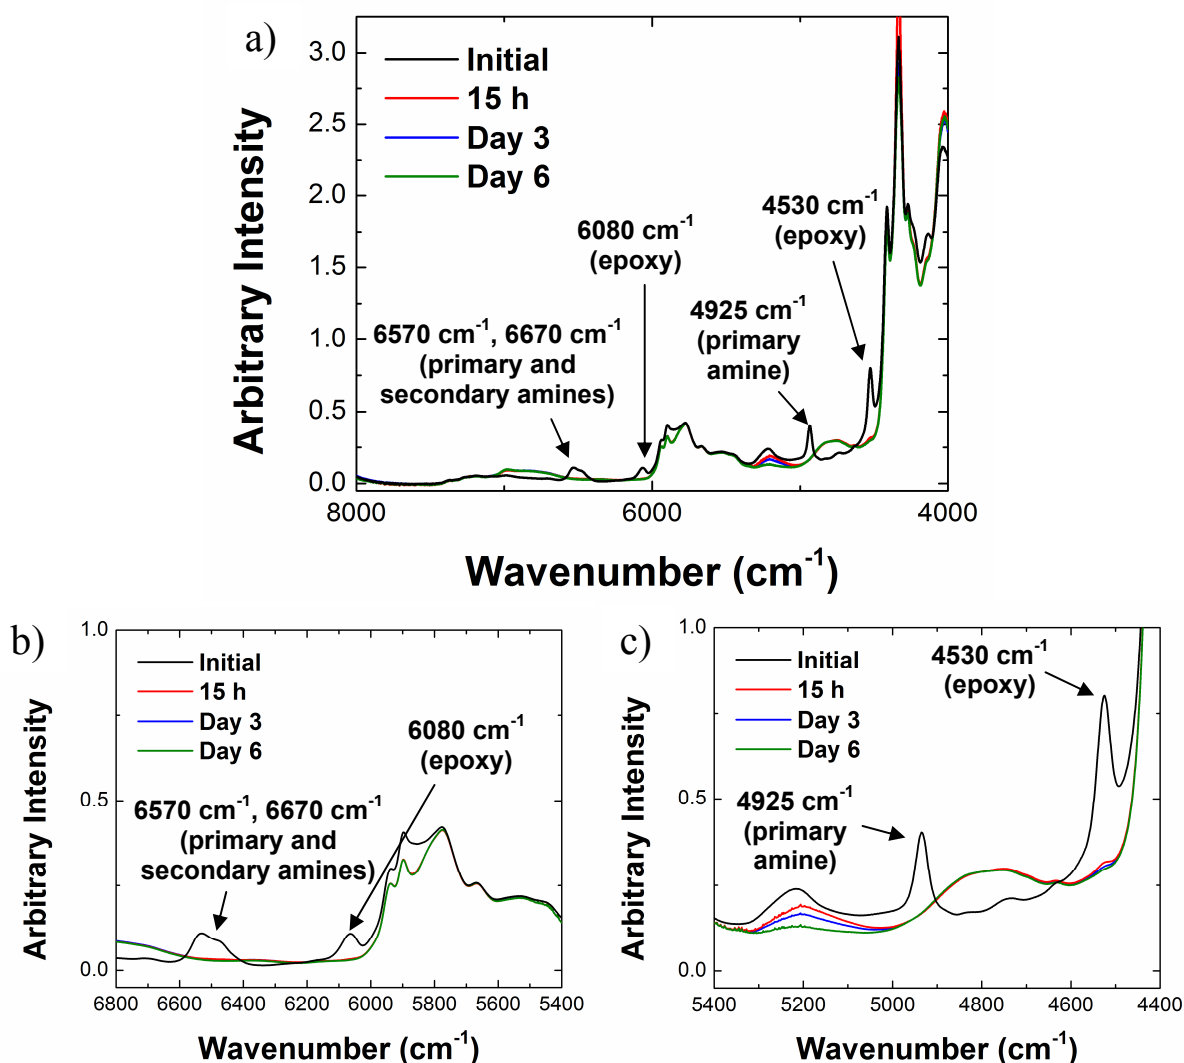

**Figure S2:** Near IR spectra of a D230 / PPGDE640 epoxy containing 0% DBP prior to curing and after, 15 h 3 days, and 6 days of cure at 90 °C in a range of a) 4000 to 8000  $\text{cm}^{-1}$  and expanded regions of b) 5400 to 6800  $\text{cm}^{-1}$  and c) 4400 to 5400  $\text{cm}^{-1}$ , respectively.

### NIR of D4000 w/ 0 % DBP

Similar data for D4000 / PPGDE 640 elastomer containing 0% DBP also demonstrates a complete cure within 6 days as determined by the complete disappearance of all of the relevant peaks (Figure S3).

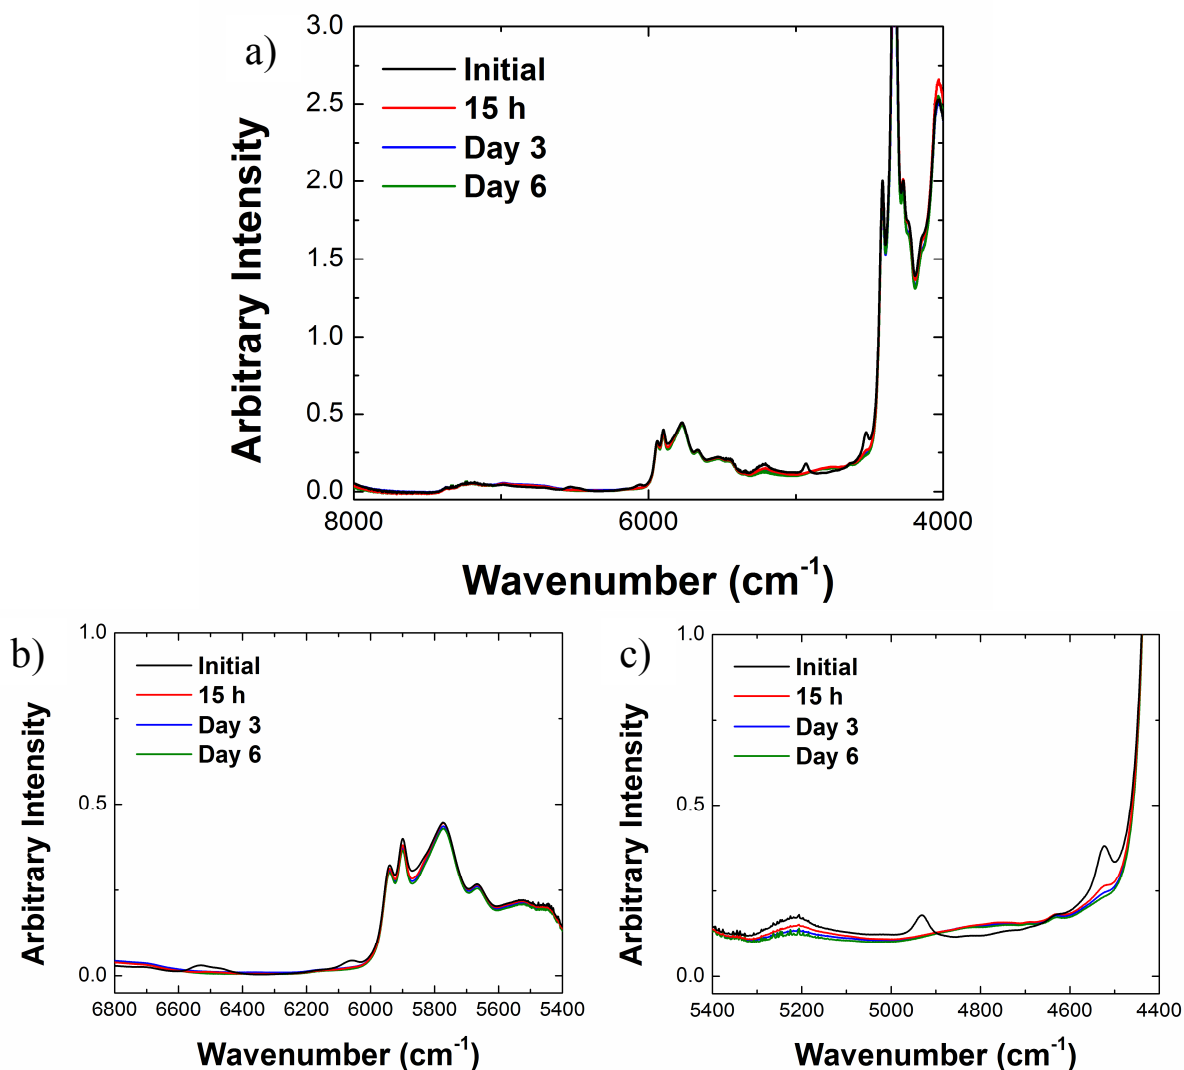

**Figure S3:** Near IR spectra of a D4000 / PPGDE640 epoxy containing 0% DBP prior to curing and after 15 h, 3 days, and 6 days of cure at 90 °C in a range of a) 4000 to 8000 cm<sup>-1</sup> and expanded regions of b) 5400 to 6800 cm<sup>-1</sup> and c) 4400 to 5400 cm<sup>-1</sup>, respectively.

## **DBP Only**

The low volatility solvent used in this study complicates the analysis because it contains a peak at  $4530\text{ cm}^{-1}$  (Figure S4). As a result, the peak at epoxy peak at  $4530\text{ cm}^{-1}$  will only be reduced to the baseline value of DBP at complete cure. To determine the extent of cure, the peak area ratio between the regions extending from  $4745\text{ cm}^{-1}$  to  $4585\text{ cm}^{-1}$ , predominantly attributed to DBP, and the region from  $4543$  to  $4503\text{ cm}^{-1}$ , containing signal from both the DBP and epoxy functionalities, were measured after 6 days of cure. At complete cure of the epoxy-amine gels, the ratio between these two regions should be similar to the ratio observed in pure DBP.

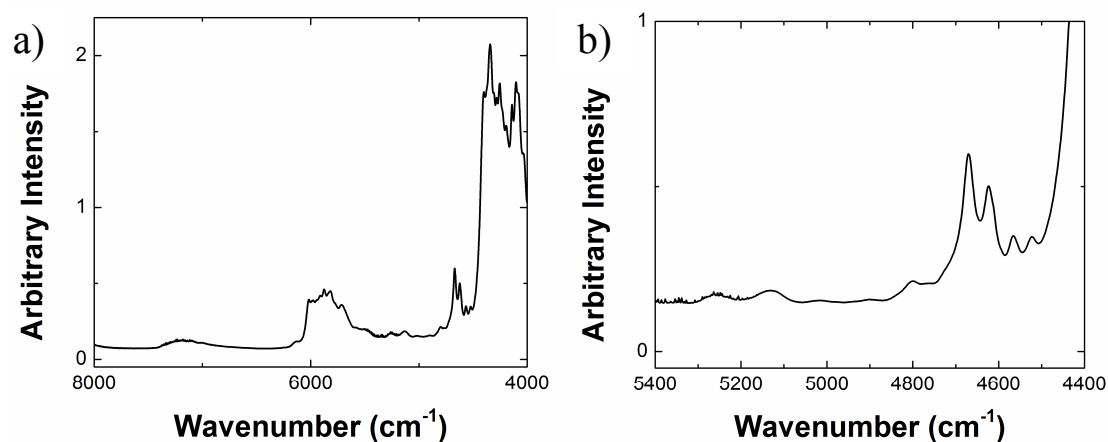

**Figure S4:** Near IR spectra of DBP in a range of a)  $4000$  to  $8000\text{ cm}^{-1}$  and an expanded region of b)  $4400$  to  $5400\text{ cm}^{-1}$ .

### D230 w/ 60 % DBP

All of the relevant peaks were weaker consistent with dilution but, were still observable with the exception of the epoxy stretching peak at  $6080\text{ cm}^{-1}$  that overlaps with the DBP spectra (Figure S5). Similar to the 0% DBP elastomers, all of the peaks exhibited near complete disappearance after 15 h cure at  $90\text{ }^{\circ}\text{C}$  with additional negligible changes between 15 h and 3 days and between 3 days and 6 days, respectively. After 6 days, the peak ratios were consistent with those of pure DBP demonstrating complete cure.

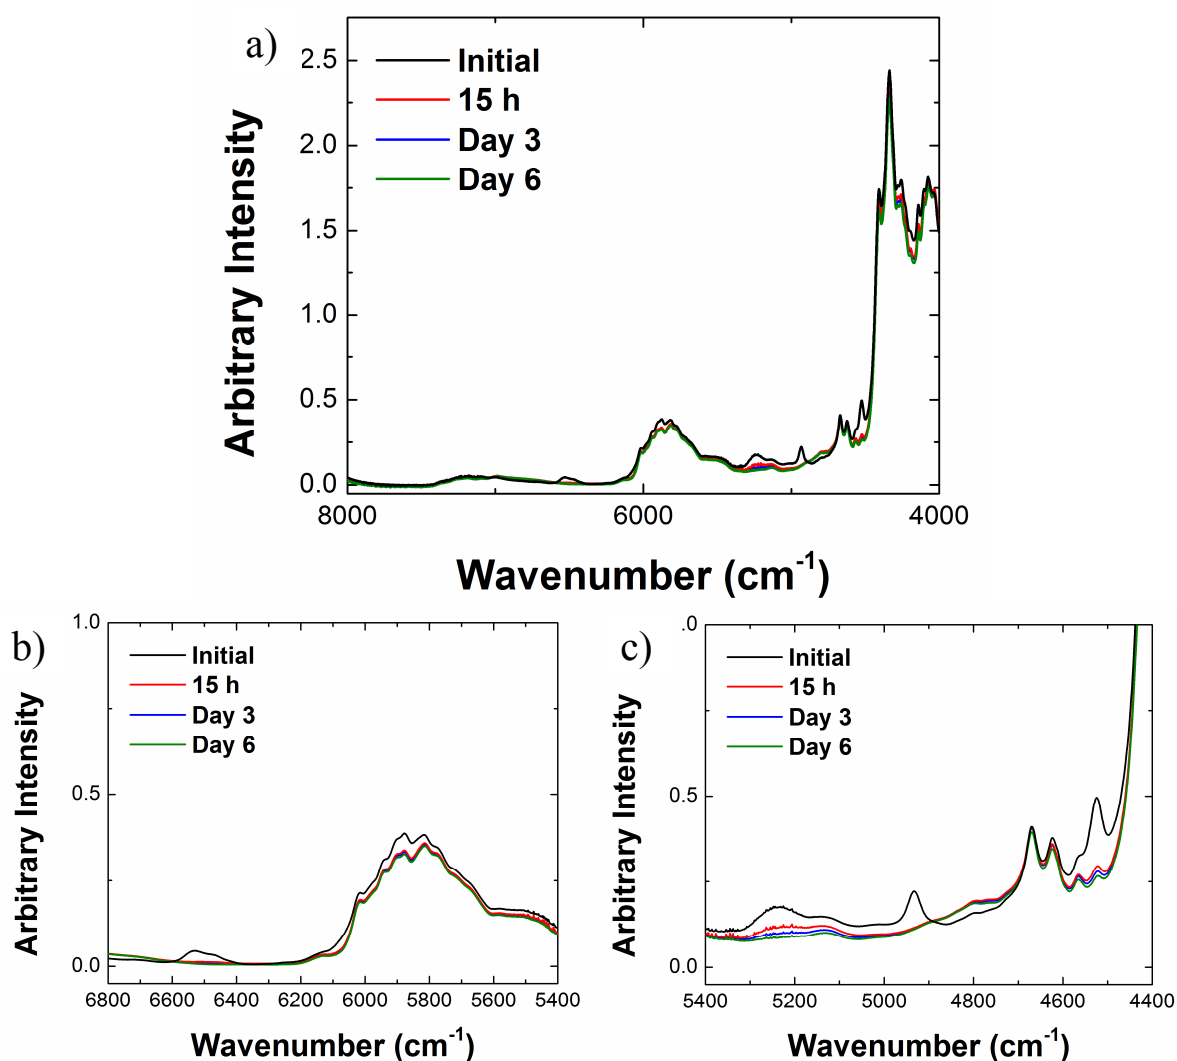

**Figure S5:** Near IR spectra of a D230 / PPGDE640 epoxy containing 60% prior to curing and after 15 h, 3 days, and 6 days of cure at  $90\text{ }^{\circ}\text{C}$  in a range of a)  $4000\text{ to }8000\text{ cm}^{-1}$  and expanded regions of b)  $5400\text{ to }6800\text{ cm}^{-1}$  and c)  $4400\text{ to }5400\text{ cm}^{-1}$ , respectively.

### **D4000 w/ 60 % DBP**

The D4000 / PPGDE640 sample containing 60% DBP exhibited similar behavior to the D230 sample containing 60% DBP (Figure S6). After 6 days of curing at 90 °C, the peak ratios were consistent with those of pure DBP demonstrating complete cure. An expanded region of 6700 to 6300  $\text{cm}^{-1}$  demonstrates that the peaks at 6570 and 6670  $\text{cm}^{-1}$ , corresponding to the primary and secondary amines, are also completely eliminated further verifying complete cure.

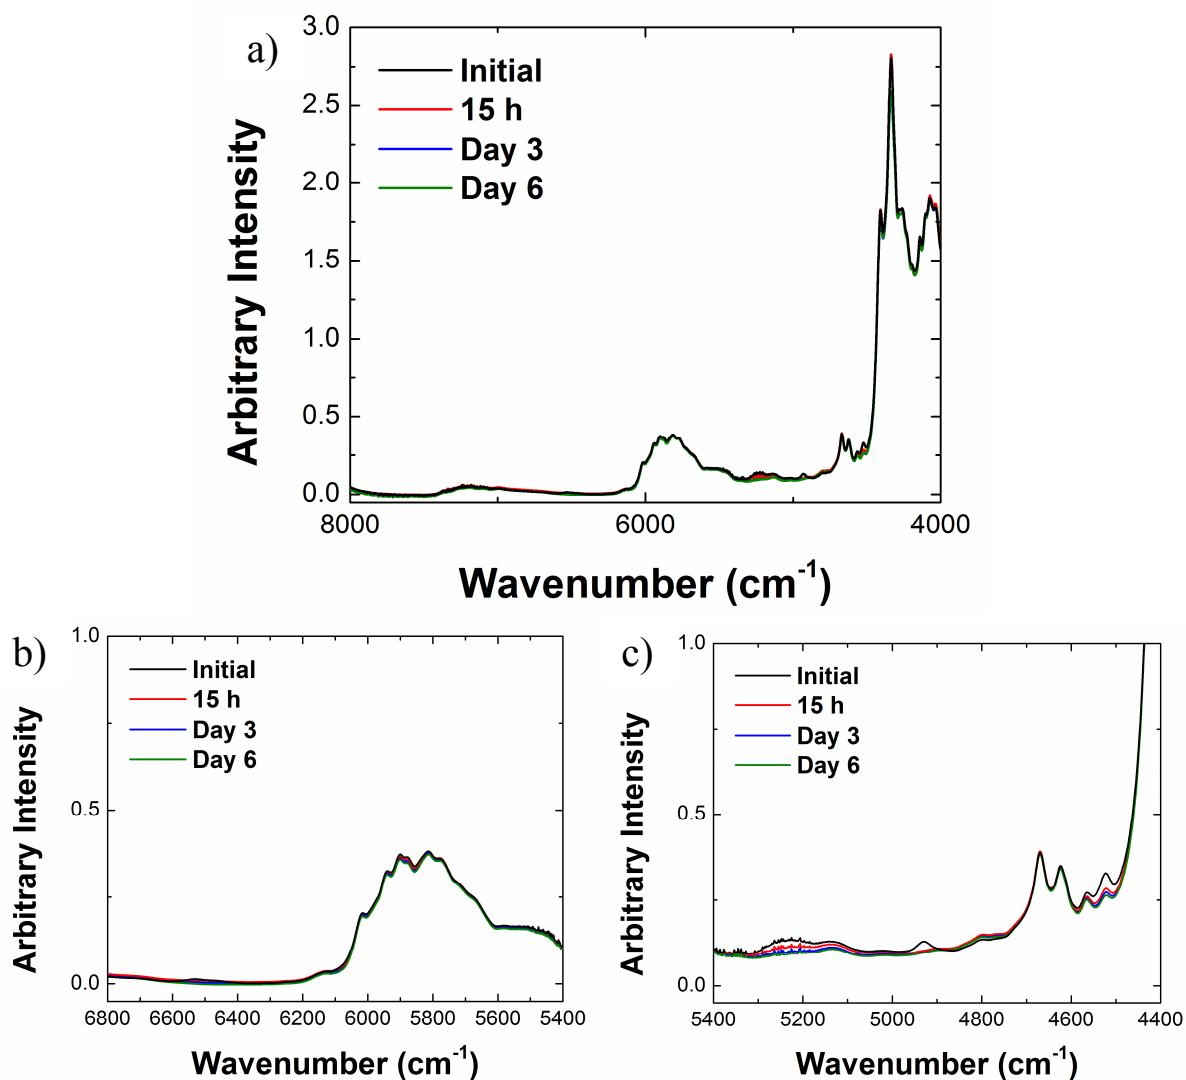

**Figure S6:** Near IR spectra of a D4000 / PPGDE640 epoxy containing 60% prior to curing and after 15 h, 3 days, and 6 days of cure at 90 °C in a range of a) 4000 to 8000  $\text{cm}^{-1}$  and expanded regions of b) 5400 to 6800  $\text{cm}^{-1}$  and c) 4400 to 5400  $\text{cm}^{-1}$ , respectively.

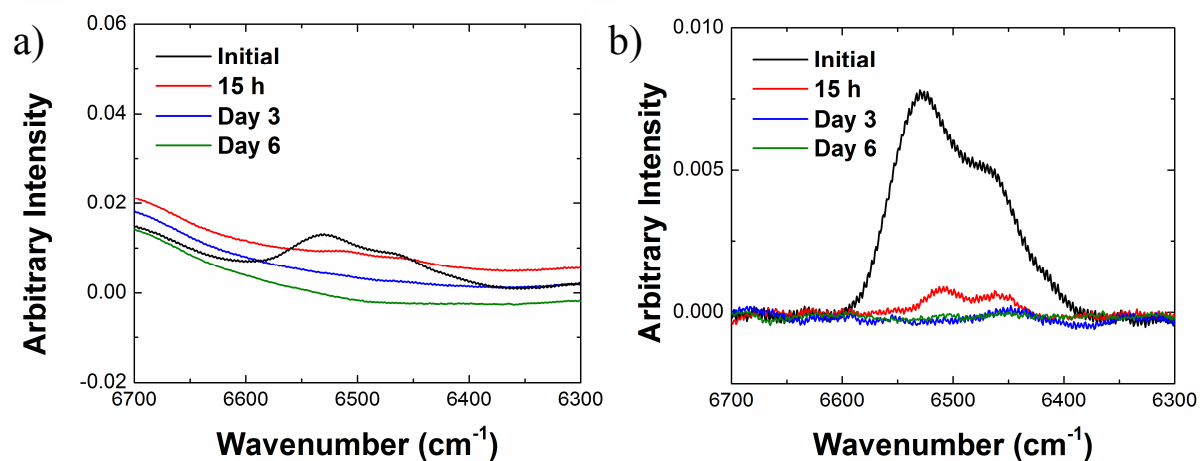

**Figure S7:** Near IR spectra of a D4000 / PPGDE640 epoxy containing 60% prior to curing and after 15 h, 3 days, and 6 days of cure at 90 °C in the range of 6700 to 6300 cm<sup>-1</sup> a) before and b) after baseline correction.

## References

1. J. Mijovic and S. Andjelic, *Macromolecules*, 1995, **28**, 2787-2796.
2. V. I. Raman and G. R. Palmese, *Macromolecules*, 2005, **38**, 6923-6930.
